# Supplementary material for: The Epstein-Barr Virus-Encoded EBNA1 Protein Activates the Bone Morphogenic Protein (BMP) Signalling Pathway to Promote Carcinoma Cell Migration
Source: Pathogens. 2020 Jul 21;9(7):594. doi: 10.3390/pathogens9070594 (PMC7400503; doi:10.3390/pathogens9070594)
Supplement: Supplementary file 1 [file pathogens-09-00594-s001.pdf]

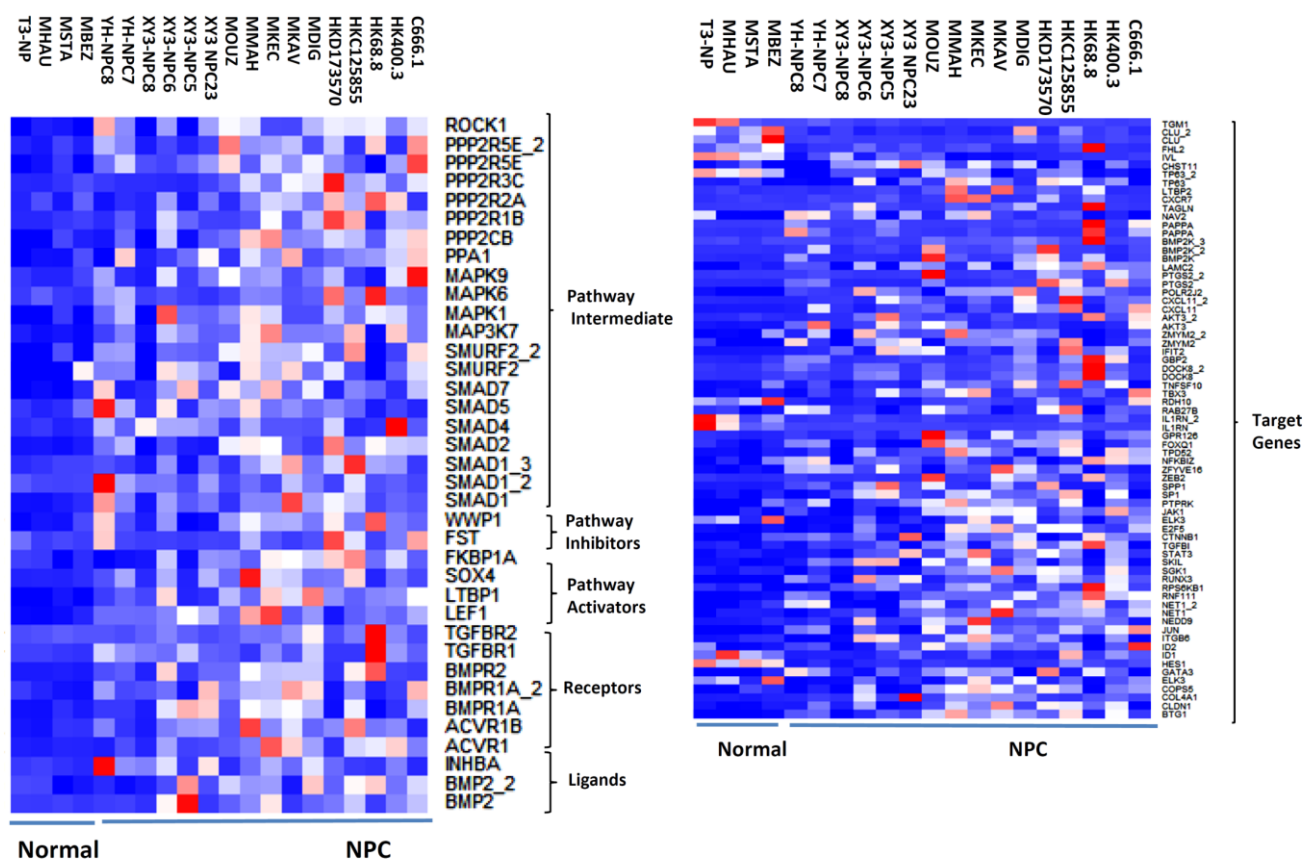

**Figure S1: Gene expression profiling of BMP pathway-associated genes in NPC tumours.** Extensive literature searches revealed a set of genes associated with the BMP signalling pathway. The resulting gene list was utilised to identify significantly differentially regulated genes, using expression array data generated in a separate study from 16 tumours and 4 normal controls, which were processed using dChip software and visualised using the heatmap package in R studio. The expression level of each gene in an individual sample is colour coded: blue for downregulation, red for upregulation and white for unchanged.

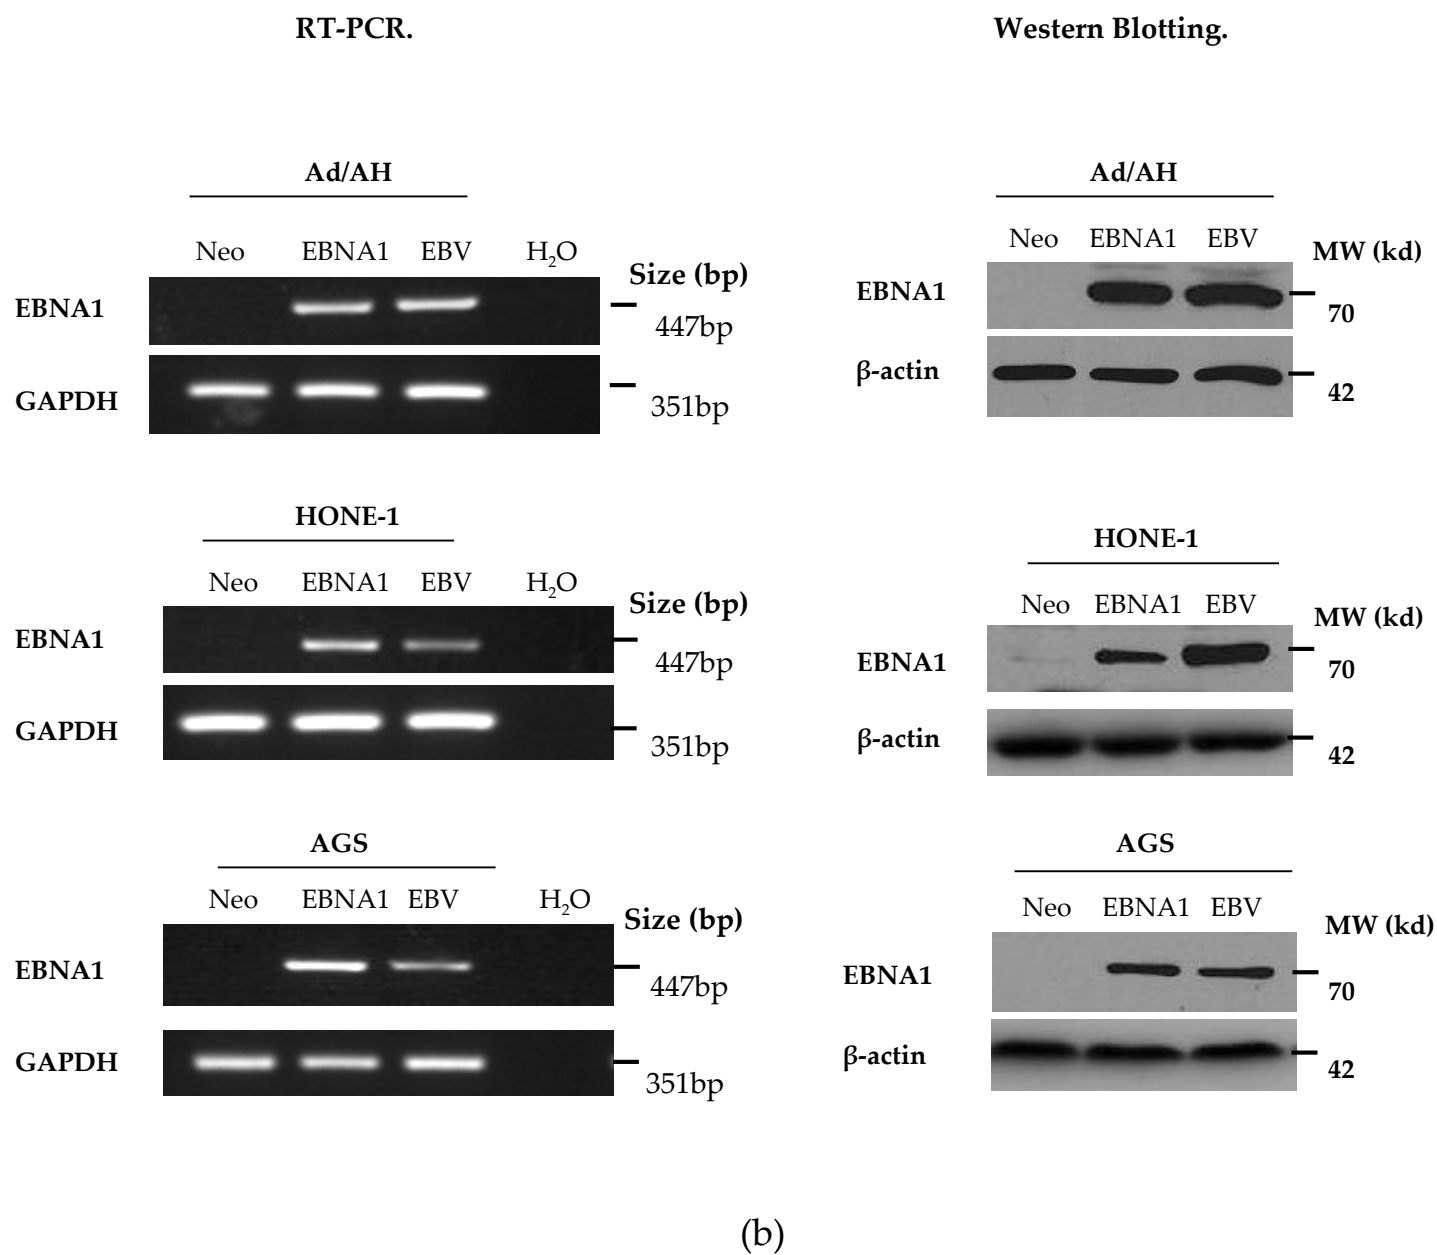

**Figure S2:** Validation of EBNA1 expression in the EBNA1 transfected and EBV infected carcinoma cell lines. RT-PCR (left panels) and western blotting (right panels) confirming EBNA1 expression in Ad/AH, HONE-1 and AGS cell lines stably expressing EBNA1 or latently infected with EBV. RT-PCR analysis was performed on mRNA extracted from neomycin control, EBNA1 transfected or EBV infected cell lines from each cell panel. H<sub>2</sub>O was included as a negative control. Western blotting of total cell lysates was performed using K67, 1:1000, a rabbit anti-serum, which detects EBNA1. β-actin was included to confirm equal protein loading.

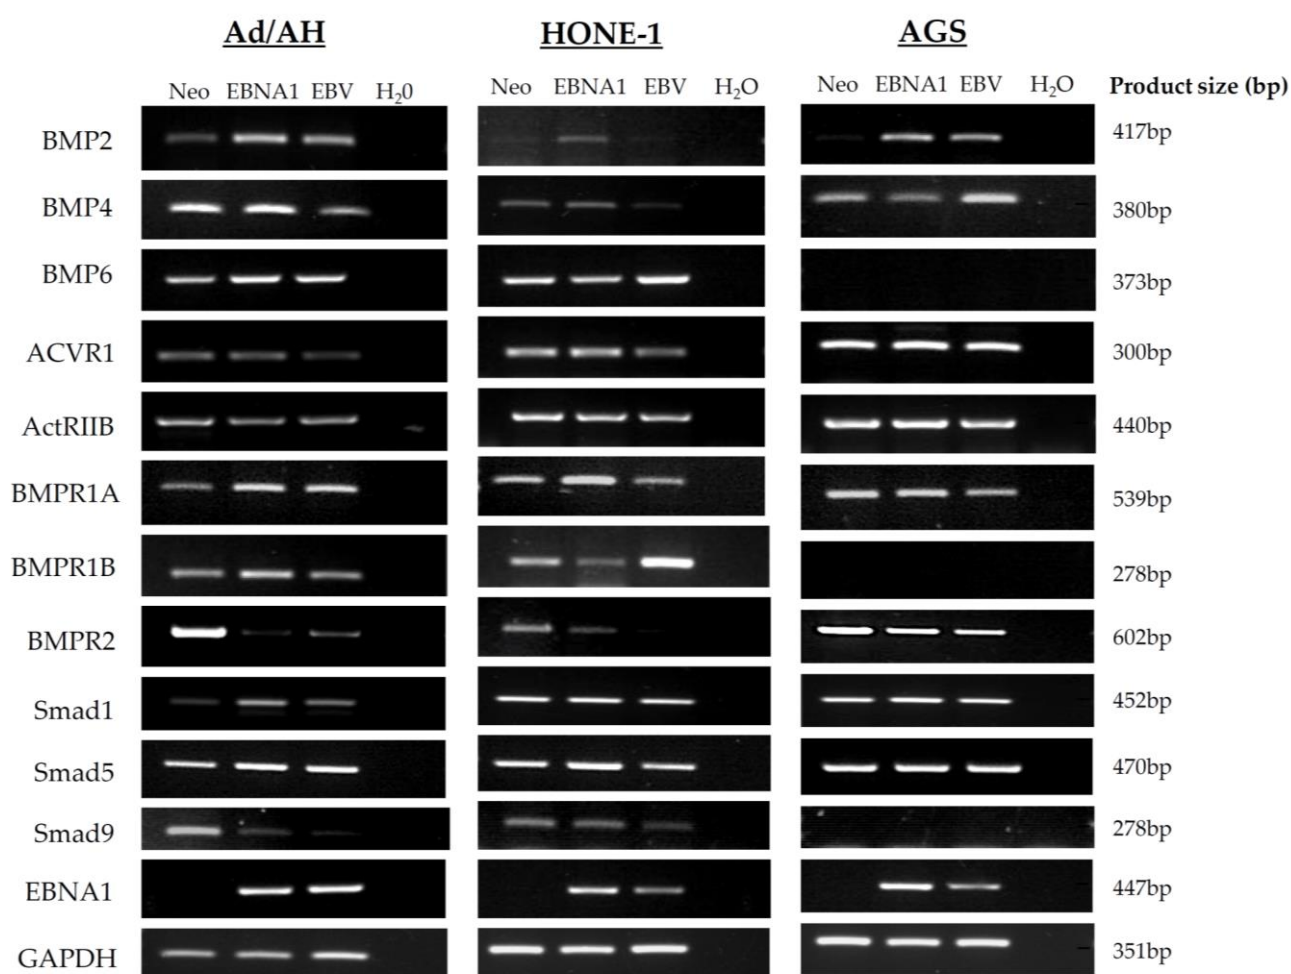

**Figure S3: Expression of BMP pathway components in the Ad/AH, HONE-1 and AGS cell panels.** RT-PCR analysis for mRNA expression levels of BMP ligands (BMP2, 4, 6 and 7), BMP receptors (ActRI, ActRIIB, BMPRI1A, BMPRI1B and BMPRI2), BMP-specific Smads (Smad1, Smad5 and Smad8) and classical BMP target genes (Id1, Id2 and Id3) in the Ad/AH, HONE-1 and AGS cell panels. EBNA1 was included as a control for EBV expression in the EBNA1 and EBV-infected cell lines and GAPDH was included as a positive control to confirm equal RNA input into the PCR reactions, while negative water controls confirmed the absence of contamination.

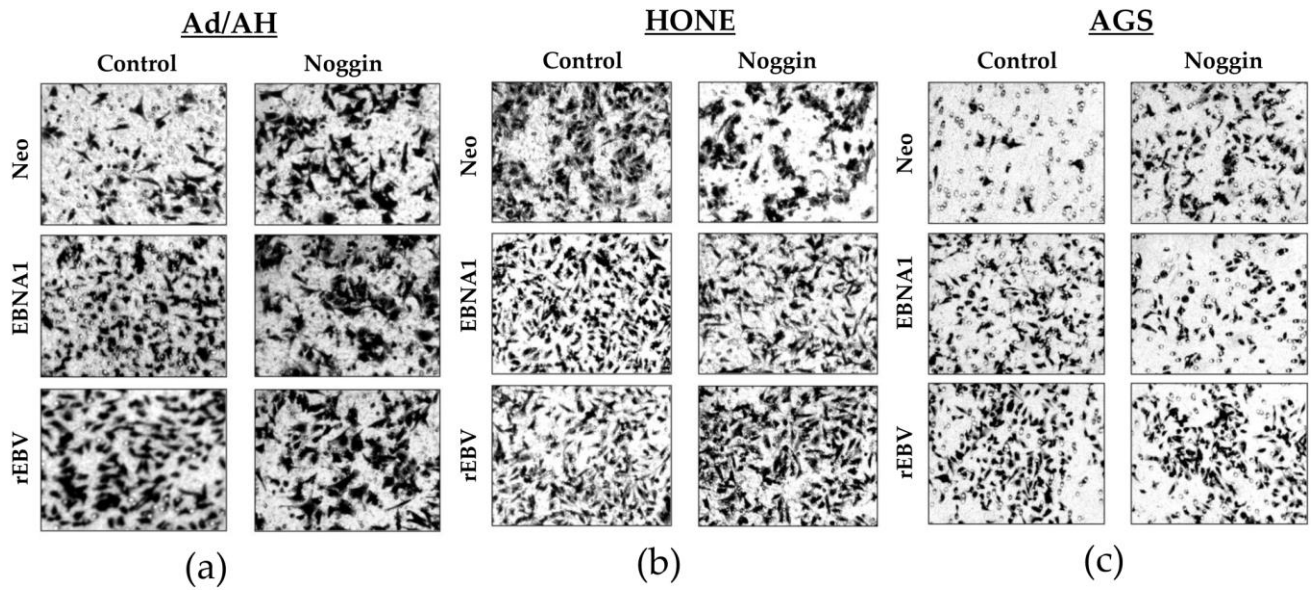

**Figure S4. The effect of inhibition of BMP signaling on the migration of Ad/AH, HONE-1 and AGS carcinoma cell lines.** Serum-starved Ad/AH (A), HONE-1 (B) and AGS (C) cells expressing either a control neomycin resistance cassette or EBNA1, or stably infected with rEBV were seeded into the upper wells of transwell migration chambers in serum-free medium with and without 100 ng/mL Noggin, and allowed to migrate for 24 hours. The number of migrated cells in five representative fields were counted and a representative image is shown.

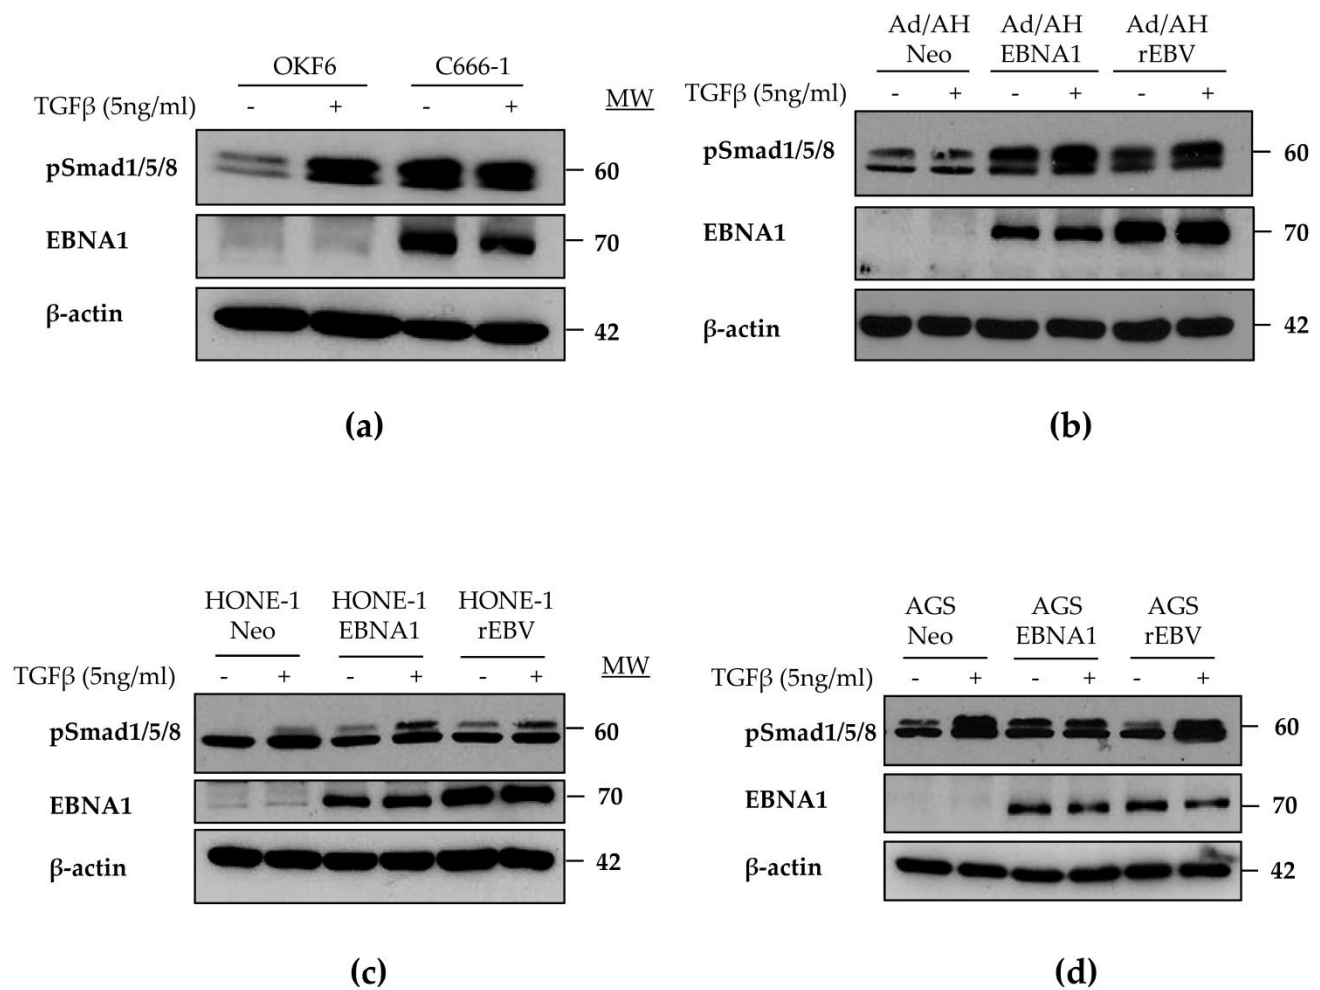

**Figure S5. Potential crosstalk between TGFβ and BMP signalling pathways in Ad/AH, HONE-1 and AGS cells.** Immunoblotting for protein levels of the phosphorylated form of Smad1/5/8 in serum-starved (a) OKF6 and C666-1 cells, (b) Ad/AH (c), HONE-1 (d) and AGS cells expressing either a control neomycin resistance cassette or EBNA1, or stably infected with rEBV, stimulated with 5ng/ml recombinant TGFβ1 for 24 hours. Immunoblotting for EBNA1 was included for confirmation of cell line status and blots were re-probed for β-actin to confirm equal protein loading.

**Supplementary Table 1.** Fold change and p-values for BMP-associated genes differentially regulated between four normal nasopharyngeal epithelium (NPE) and sixteen NPC tumours. Compiled from Hu *et al.*, 2012 [50].

|                              | Probe Set   | Description                                                            | Fold change<br>FC:(class1/class2) | p-value. (t) |
|------------------------------|-------------|------------------------------------------------------------------------|-----------------------------------|--------------|
| <b>Ligands</b>               | 205290_s_at | bone morphogenetic protein 2                                           | 2.4                               | 0.00135796   |
|                              | 210511_s_at | inhibin, beta A                                                        | 2.8                               | 0.00277305   |
| <b>Receptors</b>             | 203935_at   | activin A receptor, type I                                             | 5.2                               | 8.1589E-06   |
|                              | 213198_at   | activin A receptor, type IB                                            | 2.9                               | 0.00229758   |
|                              | 204832_s_at | bone morphogenetic protein receptor, type IA                           | 4.0                               | 0.00276395   |
|                              | 225144_at   | bone morphogenetic protein receptor, type II (serine/threonine kinase) | 5.8                               | 3.4503E-07   |
|                              | 224793_s_at | transforming growth factor, beta receptor 1                            | 3.1                               | 0.00010517   |
|                              | 208944_at   | transforming growth factor, beta receptor II (70/80kDa)                | 2.1                               | 0.05681665   |
| <b>Pathway Activators</b>    | 226853_at   | BMP2 inducible kinase                                                  | 2.78                              | 0.00177154   |
|                              | 221558_s_at | lymphoid enhancer-binding factor 1                                     | 4.8                               | 0.00028056   |
|                              | 202729_s_at | latent transforming growth factor beta binding protein 1               | 4.6616                            | 6.4648E-05   |
|                              | 201417_at   | SRY (sex determining region Y)-box 4                                   | 14.2947                           | 0.00136784   |
| <b>Pathway Inhibitors</b>    | 200709_at   | FK506 binding protein 1A, 12kDa                                        | 1.91                              | 0.04253026   |
|                              | 226847_at   | follistatin                                                            | 2.0229                            | 0.21408886   |
|                              | 212638_s_at | WW domain containing E3 ubiquitin protein ligase 1                     | 3.7301                            | 0.02392665   |
| <b>Pathway Intermediates</b> | 227798_at   | SMAD family member 1                                                   | 5.1                               | 0.00072617   |
|                              | 203077_s_at | SMAD family member 2                                                   | 3.5                               | 5.621E-05    |
|                              | 1565703_at  | SMAD family member 4                                                   | 3.2                               | 0.00016441   |
|                              | 225219_at   | SMAD family member 5                                                   | 2.4                               | 0.13049429   |
|                              | 204790_at   | SMAD family member 7                                                   | 4.4                               | 0.00295922   |
|                              | 205596_s_at | SMAD specific E3 ubiquitin protein ligase 2                            | 3.0629                            | 0.1687603    |
|                              | 206854_s_at | mitogen-activated protein kinase kinase kinase 7                       | 4.3653                            | 8.6932E-05   |
|                              | 224621_at   | mitogen-activated protein kinase 1                                     | 2.3902                            | 0.00454922   |
|                              | 207121_s_at | mitogen-activated protein kinase 6                                     | 2.1275                            | 0.02254171   |

|                        |             |                                                                        |              |             |
|------------------------|-------------|------------------------------------------------------------------------|--------------|-------------|
|                        | 203218_at   | mitogen-activated protein kinase 9                                     | 2.28         | 0.00650559  |
|                        | 217848_s_at | pyrophosphatase (inorganic) 1                                          | 1.9637       | 0.00982212  |
|                        | 201375_s_at | protein phosphatase 2, catalytic subunit, beta isozyme                 | 2.8445       | 0.02048075  |
|                        | 202883_s_at | protein phosphatase 2, regulatory subunit A, beta                      | 1.9489       | 0.00184979  |
|                        | 202313_at   | protein phosphatase 2, regulatory subunit B, alpha                     | 2.0281       | 0.14629313  |
|                        | 218852_at   | protein phosphatase 2, regulatory subunit B'', gamma                   | 3.4824       | 0.02503014  |
|                        | 203338_at   | protein phosphatase 2, regulatory subunit B', epsilon isoform          | 3.4508       | 0.00864222  |
|                        | 213044_at   | Rho-associated, coiled-coil containing protein kinase 1                | 2.2446       | 0.00130645  |
| <b>Pathway Targets</b> | 200921_s_at | B-cell translocation gene 1, anti-proliferative                        | 14.1825      | 0.02812073  |
|                        | 222549_at   | claudin 1                                                              | 2.6721       | 0.01066269  |
|                        | 211980_at   | collagen, type IV, alpha 1                                             | 10.4815      | 0.00134049  |
|                        | 201652_at   | COP9 constitutive photomorphogenic homolog subunit 5 (Arabidopsis)     | 1.8122       | 0.13774332  |
|                        | 209604_s_at | GATA binding protein 3                                                 | 2.7102       | 0.00200907  |
|                        | 218469_at   | GREM1, cysteine knot superfamily, homolog (Xenopus laevis)             | 2.42         | 0.00303     |
|                        | 203394_s_at | hairy and enhancer of split 1, (Drosophila)                            | -5.720823799 | 2.8209E-05  |
|                        | 208937_s_at | inhibitor of DNA binding 1, dominant negative helix-loop-helix protein | -3.680529996 | 0.01954223  |
|                        | 201565_s_at | inhibitor of DNA binding 2, dominant negative helix-loop-helix protein | 1.8458       | 0.21410348  |
|                        | 226535_at   | integrin, beta 6                                                       | 3.6031       | 0.10655453  |
|                        | 201466_s_at | jun proto-oncogene                                                     | 4.9458       | 0.00663596  |
|                        | 202149_at   | neural precursor cell expressed, developmentally down-regulated 9      | 4.6487       | 0.00763948  |
|                        | 201830_s_at | neuroepithelial cell transforming 1                                    | 2.3812       | 0.05250833  |
|                        | 218761_at   | ring finger protein 111                                                | 4.2177       | 0.00265316  |
|                        | 204171_at   | ribosomal protein S6 kinase, 70kDa, polypeptide 1                      | 1.9665       | 0.003246883 |
|                        | 213044_at   | Rho-associated, coiled-coil containing protein kinase 1                | 2.24         | 0.00130645  |

|  |              |                                                                                    |              |             |
|--|--------------|------------------------------------------------------------------------------------|--------------|-------------|
|  | 204197_s_at  | runt-related transcription factor 3                                                | 2.77         | 0.000823894 |
|  | 201739_at    | serum/glucocorticoid regulated kinase 1                                            | 2.0286       | 0.04658807  |
|  | 215889_at    | SKI-like oncogene                                                                  | 2.65         | 0.00015704  |
|  | 201417_at    | SRY (sex determining region Y)-box 4                                               | 14.2947      | 0.00136784  |
|  | 208991_at    | signal transducer and activator of transcription 3 (acute-phase response factor)   | 2.51         | 0.005005632 |
|  | 201506_at    | transforming growth factor, beta-induced, 68kDa                                    | 2.03         | 0.02285851  |
|  | 223679_at    | catenin (cadherin-associated protein), beta 1, 88kDa                               | 2.48         | 0.05800336  |
|  | 221586_s_at  | E2F transcription factor 5, p130-binding                                           | 2.7893       | 0.00086285  |
|  | 221773_at    | ELK3, ETS-domain protein (SRF accessory protein 2)                                 | -2.612330199 | 0.1160571   |
|  | 201648_at    | Janus kinase 1                                                                     | 3.18         | 0.02363063  |
|  | 203038_at    | protein tyrosine phosphatase, receptor type, K                                     | 4.337        | 0.10865259  |
|  | 224754_at    | Sp1 transcription factor                                                           | 1.9111       | 0.01624151  |
|  | 209875_s_at  | secreted phosphoprotein 1                                                          | 5.0          | 0.00030636  |
|  | 203603_s_at  | zinc finger E-box binding homeobox 2                                               | 2.00         | 0.00761306  |
|  | 203651_at    | zinc finger, FYVE domain containing 16                                             | 2.4803       | 0.00901215  |
|  | 223218_s_at  | nuclear factor of kappa light polypeptide gene enhancer in B-cells inhibitor, zeta | 2.16         | 0.221119    |
|  | 201690_s_at  | tumor protein D52                                                                  | 2.61         | 0.00379873  |
|  | 227475_at    | forkhead box Q1                                                                    | 2.09         | 0.03673839  |
|  | 213094_at    | G protein-coupled receptor 126                                                     | 2.18         | 0.0033964   |
|  | 212657_s_at  | interleukin 1 receptor antagonist                                                  | -10.11       | 0.02617288  |
|  | 228708_at    | RAB27B, member RAS oncogene family                                                 | 1.9          | 0.10634818  |
|  | 1552378_s_at | retinol dehydrogenase 10 (all-trans)                                               | -4.73        | 0.0039796   |
|  | 219682_s_at  | T-box 3                                                                            | 2.8          | 0.00047188  |
|  | 202688_at    | tumor necrosis factor (ligand) superfamily, member 10                              | 2.59         | 0.17155074  |
|  | 225502_at    | dedicator of cytokinesis 8                                                         | 5.39         | 0.01351608  |
|  | 202748_at    | guanylate binding protein 2, interferon-inducible                                  | 2.28         | 0.00632079  |

|  |             |                                                                                                  |       |            |
|--|-------------|--------------------------------------------------------------------------------------------------|-------|------------|
|  | 226757_at   | interferon-induced protein with tetratricopeptide repeats 2                                      | 8.56  | 2.51E-05   |
|  | 210282_at   | zinc finger, MYM-type 2                                                                          | 6.14  | 0.03015924 |
|  | 224229_s_at | v-akt murine thymoma viral oncogene homolog 3 (protein kinase B, gamma)                          | 5.51  | 0.00036601 |
|  | 210163_at   | chemokine (C-X-C motif) ligand 11                                                                | 4.97  | 6.07E-05   |
|  | 1552621_at  | polymerase (RNA) II (DNA directed) polypeptide J2                                                | 4.29  | 0.00257493 |
|  | 204748_at   | prostaglandin-endoperoxide synthase 2 (prostaglandin G/H synthase and cyclooxygenase)            | 2.99  | 0.00189618 |
|  | 202267_at   | laminin, gamma 2                                                                                 | 2.95  | 0.05186757 |
|  | 212764_at   | zinc finger E-box binding homeobox 1                                                             | 2.82  | 0.000844   |
|  | 226853_at   | BMP2 inducible kinase                                                                            | 2.78  | 0.00177154 |
|  | 228128_x_at | pregnancy-associated plasma protein A, pappalysin 1                                              | 2.70  | 0.01173797 |
|  | 218330_s_at | neuron navigator 2                                                                               | 2.66  | 0.2213328  |
|  | 205547_s_at | transgelin                                                                                       | 2.04  | 0.06872712 |
|  | 212977_at   | chemokine (C-X-C motif) receptor 7                                                               | 2.00  | 0.12313027 |
|  | 223690_at   | latent transforming growth factor beta binding protein 2                                         | 1.90  | 0.0556189  |
|  | 211834_s_at | tumor protein p63                                                                                | -3.40 | 3.94E-05   |
|  | 226368_at   | carbohydrate (chondroitin 4) sulfotransferase 11                                                 | 1.71  | 0.17721501 |
|  | 214599_at   | involucrin                                                                                       | -2.53 | 0.00051036 |
|  | 202949_s_at | four and a half LIM domains 2                                                                    | -2.53 | 0.02562237 |
|  | 208792_s_at | clusterin                                                                                        | -5.31 | 0.0424232  |
|  | 206008_at   | transglutaminase 1 (K polypeptide epidermal type I, protein-glutamine-gamma-glutamyltransferase) | -3.76 | 0.10694314 |
